# Supplementary material for: A novel rapid synthesis of highly stable silver nanoparticle/carbon quantum dot nanocomposites derived from low-grade coal feedstock
Source: Royal Society of Chemistry journal article supplement (doi:10.1039/d1nj04039a), 2021-11-16
Supplement: d1nj04039a1.pdf [file d1nj04039a1.pdf]

## Supplementary Information

### A novel rapid synthesis of highly stable silver nanoparticle/carbon quantum dot nanocomposites derived from low-grade coal feedstock

Monikankana Saikia<sup>ab</sup>, Tonkeswar Das<sup>a</sup>, Binoy K Saikia<sup>ab\*</sup>

<sup>a</sup>Coal & Energy Group, Materials Science and Technology Division, CSIR-North East

Institute of Science & Technology, Jorhat 785006, India

<sup>b</sup>Academy of Scientific & Innovative Research (AcSIR), Ghaziabad 201002, India

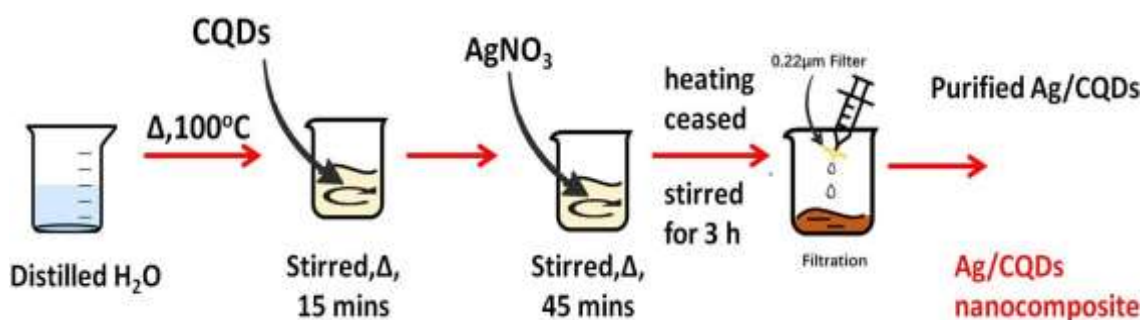

Figure S-1. Schematic diagram of the fabrication of Ag/CQDs nanocomposite

Table S-1. Physico-chemical properties of the coal samples

| Coal Sample (Raw) | Proximate Analysis (%) |       |      |       | Ultimate Analysis (%) |      |      | TS (%) |
|-------------------|------------------------|-------|------|-------|-----------------------|------|------|--------|
|                   | M                      | VM    | Ash  | FC    | C                     | H    | N    |        |
| Coal              | 2.55                   | 38.87 | 6.75 | 51.83 | 78.46                 | 6.02 | 0.96 | 4.09   |

(M-Moisture; Ash-Ash content; VM-Volatile Matter; FC-Fixed Carbon; C-Carbon; H-Hydrogen; N-Nitrogen; TS-Total Sulfur)

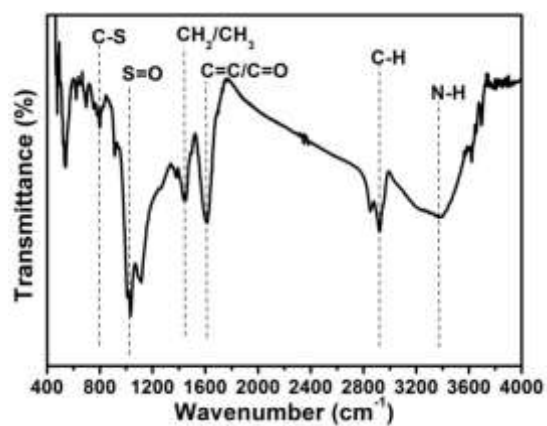

Figure S-2. FTIR spectra of raw coal

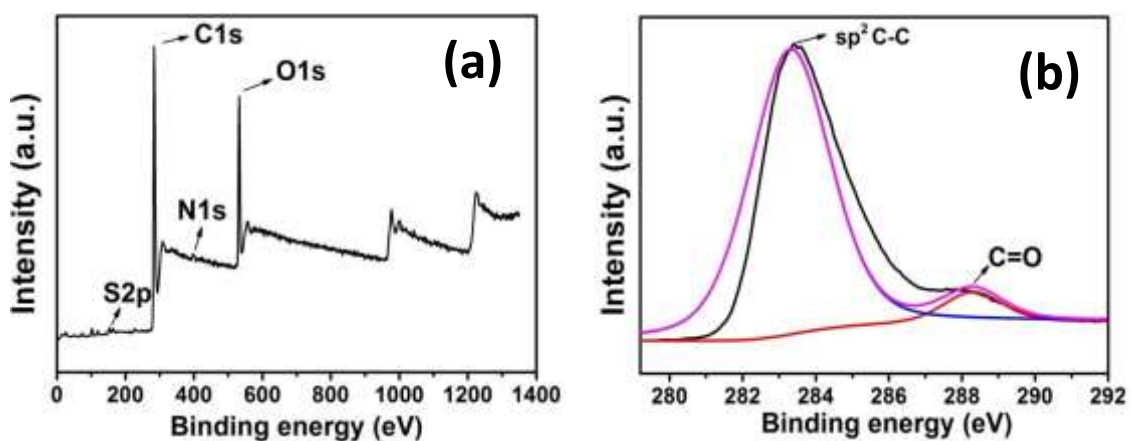

Figure S-3. (a) XPS spectra of raw coal along with the (b) C1s deconvoluted spectra.

Table S-2. XPS data of Ag/CQDs nanocomposite

| Sample  | Atomic Percentage (%) |                   |                                    |                   |                   |
|---------|-----------------------|-------------------|------------------------------------|-------------------|-------------------|
|         | C<br>(280-292 eV)     | O<br>(526-536 eV) | Ag<br>(367-373 eV)<br>(573-603 eV) | N<br>(397-407 eV) | S<br>(164-172 eV) |
| CQDs    | 53.17                 | 31.71             | -                                  | 13.80             | 1.32              |
| Ag/CQDs | 46.35                 | 23.04             | 17.58                              | 10.98             | 2.05              |

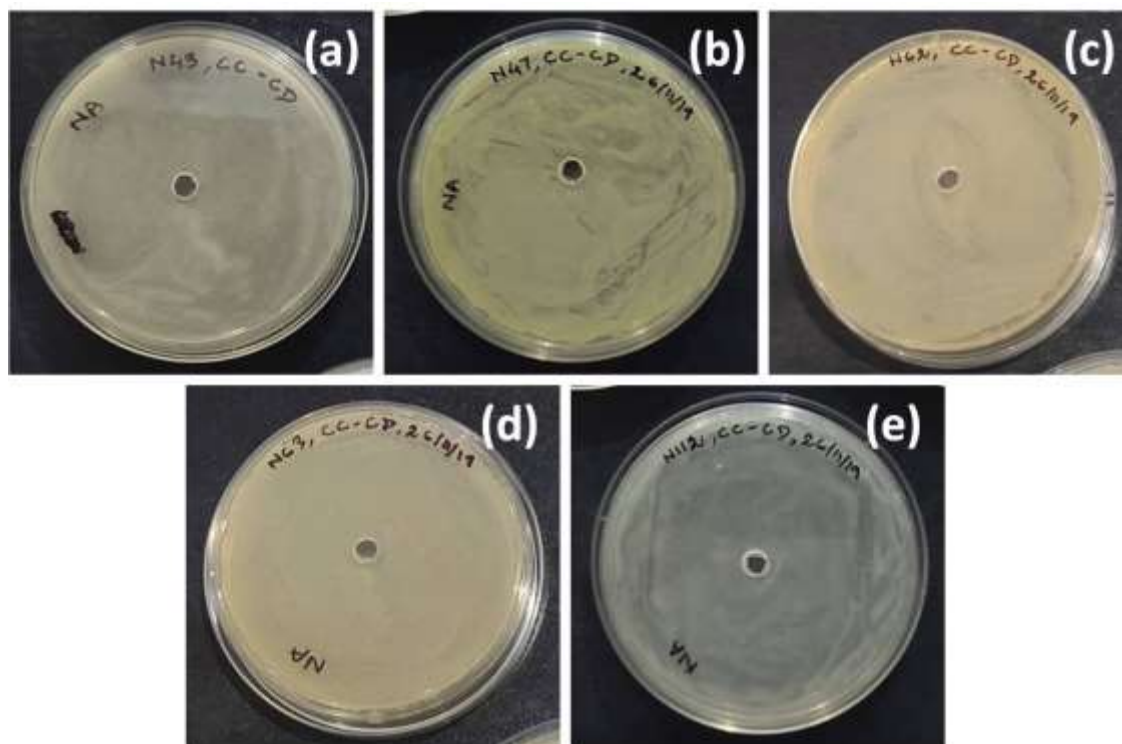

**Figure S-4.** The antibacterial effect of CQDs against various bacterial strains (a) Photograph of *Bacillus pseudomyoides* bacteria, (b) Photograph of *Glutamibacter nicotianae*, (c) Photograph of *Phytobacter ursingii* bacteria, (d) Photograph of *Bacillus wiedmannii* bacteria, (e) Photograph of *Rhodococcus soli* bacteria.

**Table S-3: The inhibition zone diameters of some reported antibacterial nanomaterials**

| Sample                   | Bacterial Strain                | Inhibition Zone (mm) | Reference       |
|--------------------------|---------------------------------|----------------------|-----------------|
| CDs/AgNPs                | <i>E. coli</i>                  | 12-13                | 1               |
|                          | <i>S. aureus</i>                | 13-15                |                 |
| AgNPs                    | <i>E. coli</i>                  | 12.5                 | 2               |
|                          | <i>S. aureus</i>                | 11.5                 |                 |
| AgNPs                    | <i>E. coli</i>                  | 13                   | 3               |
|                          | <i>S. aureus</i>                | 18                   |                 |
| AgNPs                    | <i>E. coli</i>                  | 22                   | 4               |
| AgNPs                    | <i>Escherichia coli</i>         | 12                   | 5               |
|                          | <i>Bacillus megaterium</i>      | 6                    |                 |
| AgNPs                    | <i>E. coli</i>                  | 12                   | 6               |
| AgNPs                    | <i>Escherichia coli</i>         | 11                   | 7               |
|                          | <i>Staphylococcus aureus</i>    | 13                   |                 |
|                          | <i>Pseudomonas aeruginosa</i>   | 12                   |                 |
| AgNPs                    | <i>E. coli</i>                  | 10.5                 | 8               |
|                          | <i>S. aureus</i>                | 9.5                  |                 |
|                          | <i>Klebsiella pneumoniae</i>    | 8.5                  |                 |
|                          | <i>Micrococcus flavus</i>       | 9                    |                 |
|                          | <i>Pseudomonas aeruginosa</i>   | 10.5                 |                 |
|                          | <i>Bacillus subtilis</i>        | 10                   |                 |
| GO/AgNPs                 | <i>S. aureus</i>                | 9-12                 | 9               |
| Ag/CQDs<br>Nanocomposite | <i>Bacillus pseudomyoides</i>   | 12                   | Present<br>Work |
|                          | <i>Glutamibacter nicotianae</i> | 15                   |                 |
|                          | <i>Phytobacter ursingii</i>     | 14                   |                 |
|                          | <i>Bacillus wiedmannii</i>      | 16                   |                 |
|                          | <i>Rhodococcus soli</i>         | 18                   |                 |

**References:**

- (1) Wei, X.; Cheng, F.; Yao, Y.; Yi, X.; Wei, B.; Li, H.; Wu, Y.; He, J., Facile synthesis of a carbon dots and silver nanoparticles (CDs/AgNPs) composite for antibacterial application. *RSC Advances* **2021**, *11* (30), 18417-18422.
- (2) Dutta, T.; Chowdhury, S. K.; Ghosh, N. N.; Das, M.; Chattopadhyay, A.; Mandal, V., Green Synthesis of Antimicrobial Silver Nanoparticles using Fruit Extract of *Glycosmis Pentaphylla* and its Theoretical Explanations. Research Square: 2021.

- (3) Khan, Z.; Al-Thabaiti, S. A., Biogenic silver nanoparticles: Green synthesis, encapsulation, thermal stability and antimicrobial activities. *Journal of Molecular Liquids* **2019**, 289, 111102.
- (4) Mai, X-D.; Le, Q-T.; Thi, L-A. N.; Thi, P. N.; Thi, P. L.; La, V-H.; Photosynthesis of Silver Nano Particle - Carbon Quantum Dots Nano Composites. *Material Science Research India* **2019**, 16(2), 118-124.
- (5) Theivasanthi, T.; Alagar M., Anti-bacterial Studies of Silver Nanoparticles. arXiv:1101.0348 physics.gen-ph 2011.
- (6) Pirtarighat, S.; Ghannadnia, M.; Baghshahi, S., Green synthesis of silver nanoparticles using the plant extract of *Salvia spinosa* grown in vitro and their antibacterial activity assessment. *Journal of Nanostructure in Chemistry* **2019**, 9 (1), 1-9.
- (7) Premasudha, P.; Venkataramana, M.; Abirami, M.; Vanathi, P.; Krishna, K.; Rajendran, R., Biological synthesis and characterization of silver nanoparticles using *Eclipta alba* leaf extract and evaluation of its cytotoxic and antimicrobial potential. *Bulletin of Materials Science* **2015**, 38 (4), 965-973.
- (8) Anandalakshmi, K.; Venugobal, J.; Ramasamy, V., Characterization of silver nanoparticles by green synthesis method using *Petalium murex* leaf extract and their antibacterial activity. *Applied Nanoscience* **2016**, 6 (3), 399-408.
- (9) Das, M. R.; Sarma, R. K., Borah, S. C.; Kumari, R.; Saikia, R.; Deshmukh, A. B.; Shelke, M. V.; Sengupta, P.; Szunerits, S.; Boukherroub, R., The synthesis of citrate-modified silver nanoparticles in an aqueous suspension of graphene oxide nanosheets and their antibacterial activity. *Colloids and Surfaces B: Biointerfaces* **2013**, 105, 128-136.
